# Supplementary material for: A whole-procedure solvent-free route to CO2-based waterborne polyurethane by an elevated-temperature dispersing strategy
Source: Royal Society of Chemistry journal article supplement (doi:10.1039/c7gc00726d), 2017-01-01
Supplement: c7gc00726d1.pdf [file c7gc00726d1.pdf]

## Supporting Information

### Whole procedure solvent free route to CO<sub>2</sub> based waterborne polyurethane by elevated temperature dispersing strategy

Jin Wang, Hongming Zhang\*, Yuyang Miao, Lijun Qiao, Xianhong Wang\*

#### Supporting information mentioned in main article

Scheme S1. Whole procedure VOC free preparation of CO<sub>2</sub>-WPU by elevated temperature dispersing (ETD) strategy.

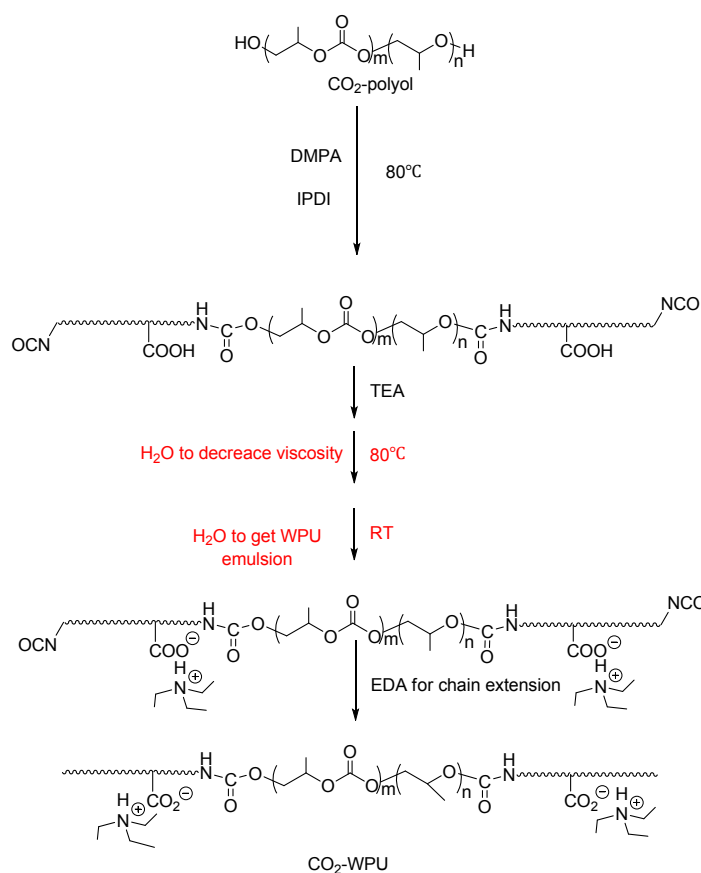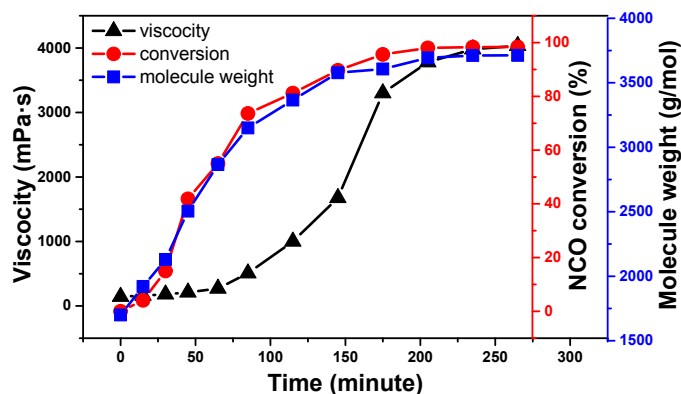

Figure S1 Dependences of reactant viscosity, NCO conversion and molecular weight of reactant on reaction time (for typical CO<sub>2</sub>-WPU).

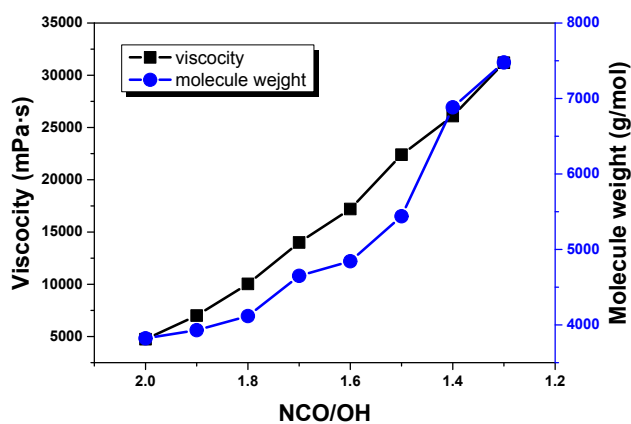

**Figure.S2** Dependence of viscosity and molecule weight of prepolymer on NCO/OH from IPDI and CO<sub>2</sub>-polyol with M<sub>n</sub> of 1350 g/mol and carbonate content of 30%.

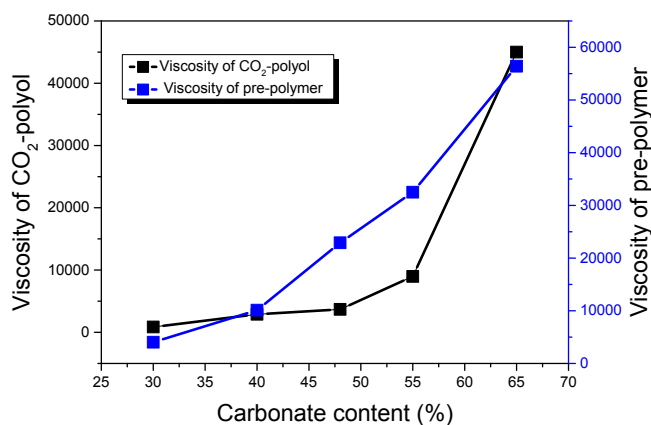

**Figure.S3** Dependence of viscosity of CO<sub>2</sub>-polyol and prepolymer on carbonate content of CO<sub>2</sub>-polyol with similar M<sub>n</sub> of 1400 g/mol, NCO/OH to be 2, and IPDI as the diisocyanate.

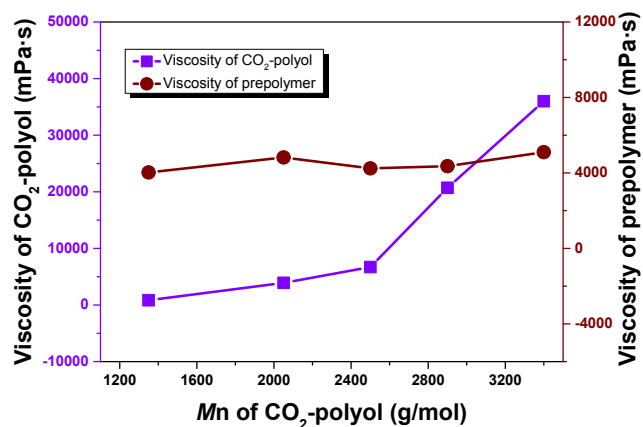

**Figure.S4** Dependence of viscosity of CO<sub>2</sub>-polyol and prepolymer on molecule weight of CO<sub>2</sub>-polyol with uniform carbonate content of 30%, NCO/OH to be 2, and IPDI as the diisocyanate.

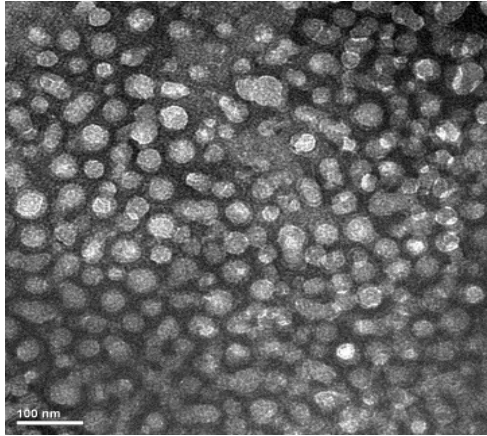

Figure.S5 TEM image of CO<sub>2</sub>-WPU emulsion particles.

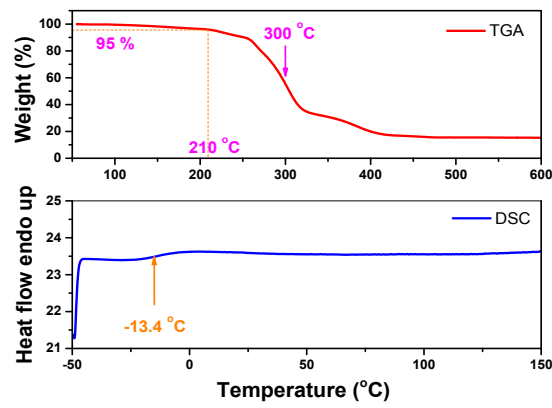

Figure.S6 TGA and DSC trace of CO<sub>2</sub>-WPU multi-film.

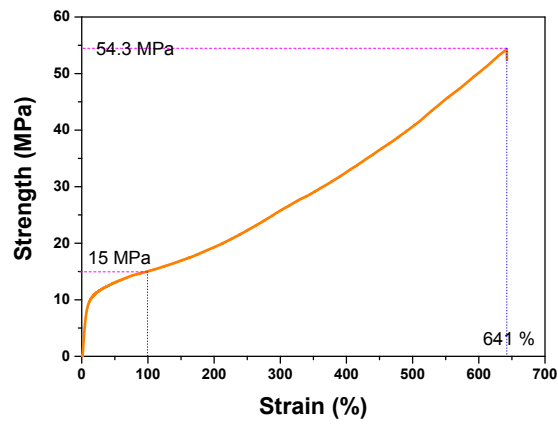

Figure.S7 Tensile stress strain curve of typical CO<sub>2</sub>-WPU dried film.

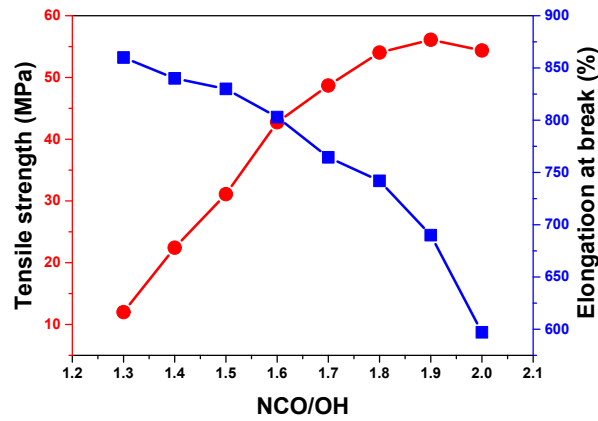

Figure.S8 Dependence of tensile strength and elongation at break of CO<sub>2</sub>-WPUs on NCO/OH of prepolymer.

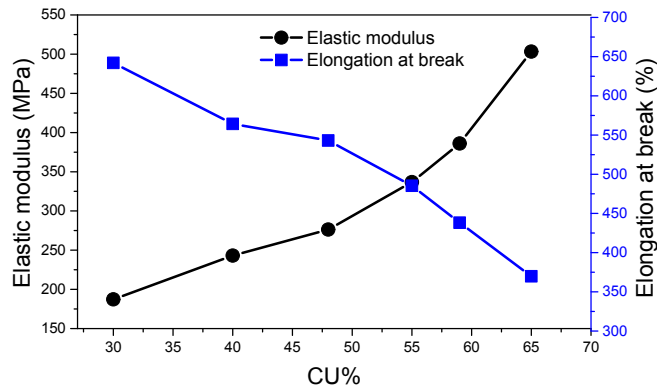

Figure.S9 Dependence of elastic modulus and elongation and break of CO<sub>2</sub>-WPUs on carbonate content of CO<sub>2</sub>-polyol.

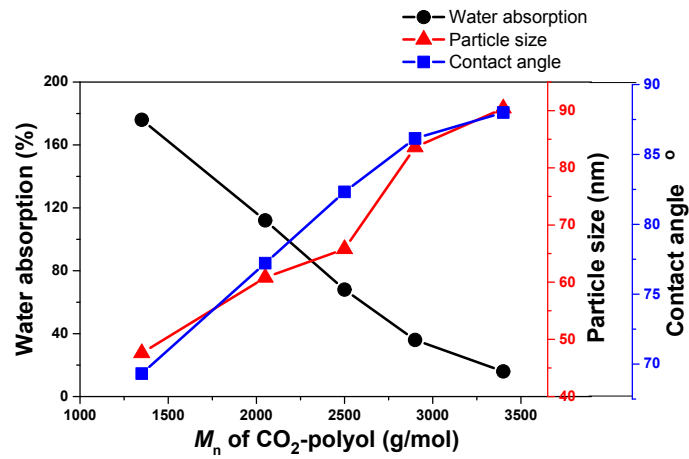

Figure.S10 Dependence of particle size, contact angle, and water absorption on M<sub>n</sub> of CO<sub>2</sub>-polyol.

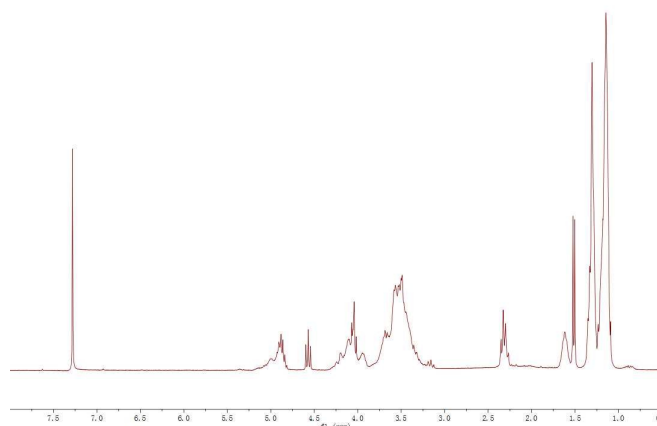

**Figure.S11a** <sup>1</sup>H-NMR spectral of CO<sub>2</sub>-polyol with carbonate content (CU%) and molecule weight ( $M_n$ ) respectively to be 30% and 1350 g/mol.

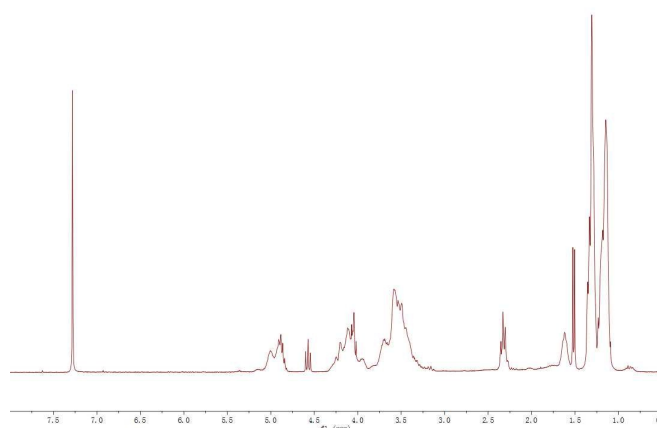

**Figure.S11b** <sup>1</sup>H-NMR spectral of CO<sub>2</sub>-polyol with CU% and  $M_n$  respectively to be 40% and 1450 g/mol.

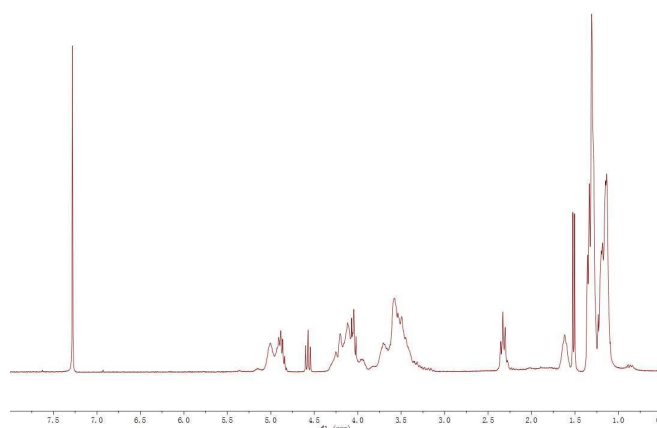

**Figure. S11c** <sup>1</sup>H-NMR spectral of CO<sub>2</sub>-polyol with CU% and  $M_n$  respectively to be 48% and 1400 g/mol..

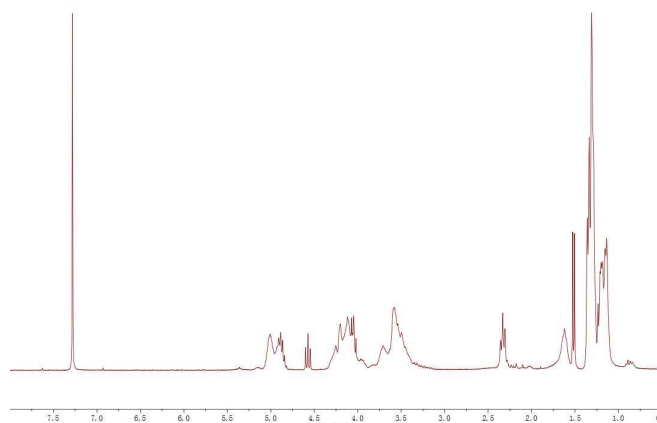

**Figure. S11d** <sup>1</sup>H-NMR spectral of CO<sub>2</sub>-polyol with CU% and *M<sub>n</sub>* respectively to be 55% and 1400 g/mol.

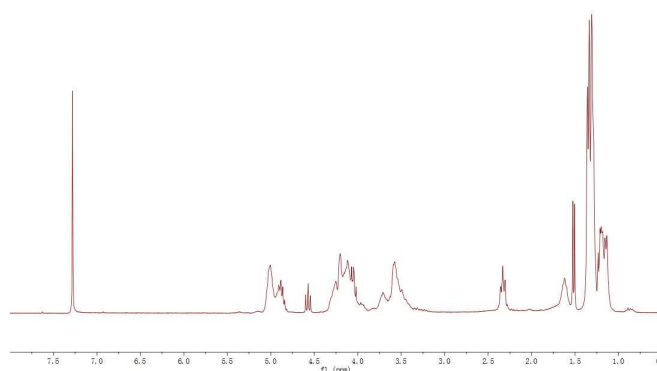

**Figure. S11e** <sup>1</sup>H-NMR spectral of CO<sub>2</sub>-polyol with CU% and *M<sub>n</sub>* respectively to be 65% and 1450 g/mol.

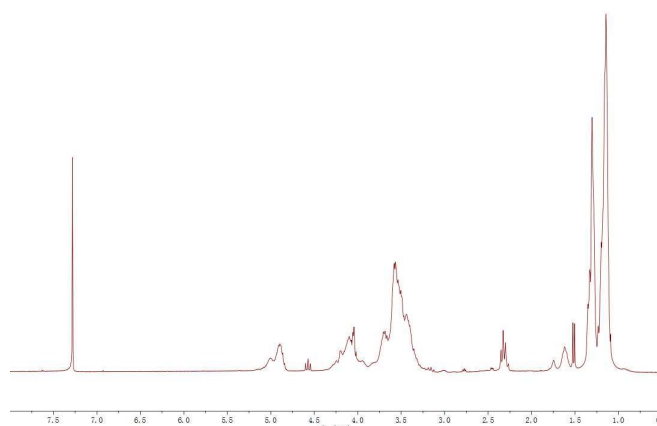

**Figure. S11f** <sup>1</sup>H-NMR spectral of CO<sub>2</sub>-polyol with CU% and *M<sub>n</sub>* respectively to be 30% and 2050 g/mol.

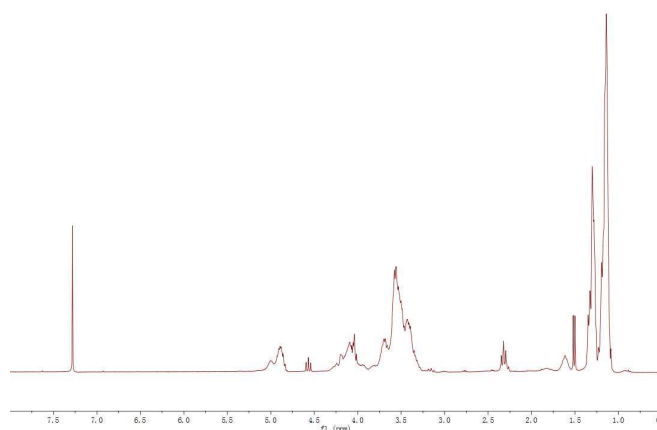

**Figure. S11g**  $^1\text{H-NMR}$  spectral of  $\text{CO}_2$ -polyol with CU% and  $M_n$  respectively to be 30% and 2500 g/mol.

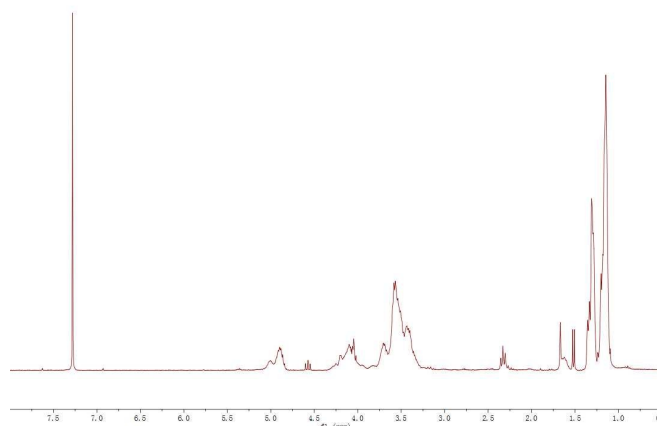

**Figure. S11h**  $^1\text{H-NMR}$  spectral of  $\text{CO}_2$ -polyol with CU% and  $M_n$  respectively to be 30% and 2900 g/mol.

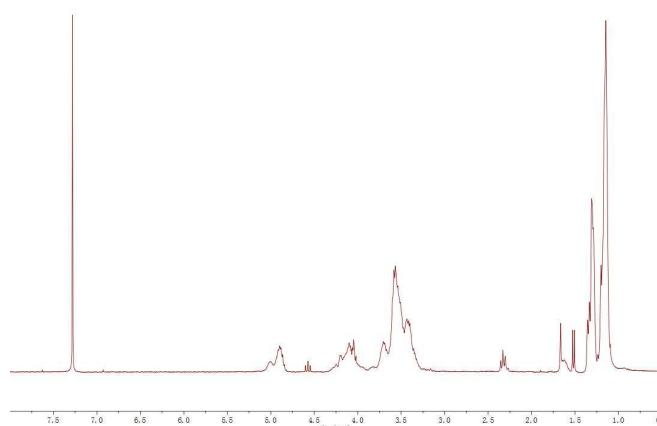

**Figure. S11i**  $^1\text{H-NMR}$  spectral of  $\text{CO}_2$ -polyol with CU% and  $M_n$  respectively to be 30% and 3400 g/mol.

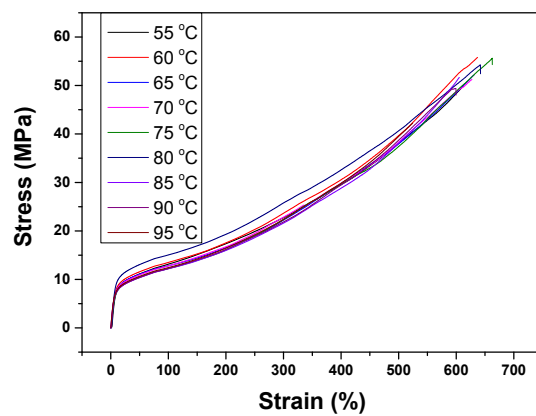

**Figure. S12.** Tensile stress strain curves of typical  $\text{CO}_2$ -WPU with different dispersing temperature.

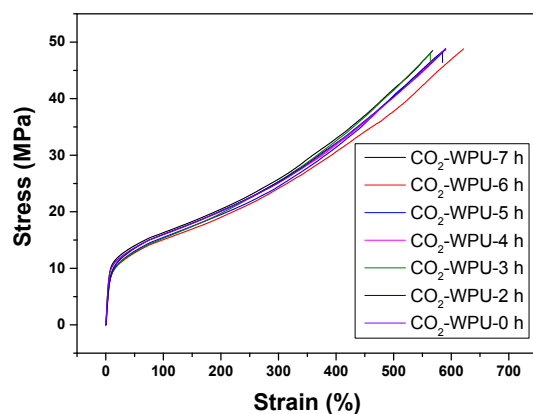

**Figure. S13.** Tensile stress strain curves of CO<sub>2</sub>-WPU from CO<sub>2</sub>-polyol with CU% and  $M_n$  respectively to be 30% and 2050 g/mol. after different immersion time in 0.5% NaOH aqueous solution.

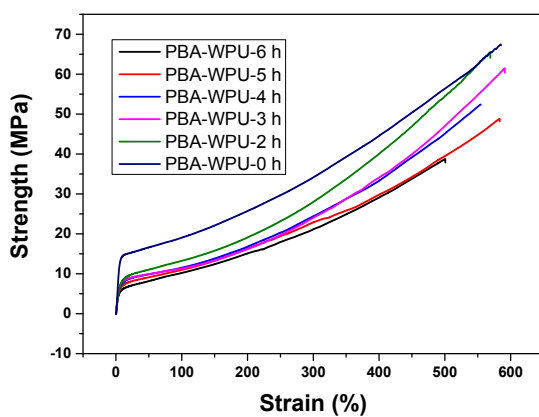

**Figure. S14.** Tensile stress strain curves of PBA-WPU after different immersion time in 0.5% NaOH aqueous solution.

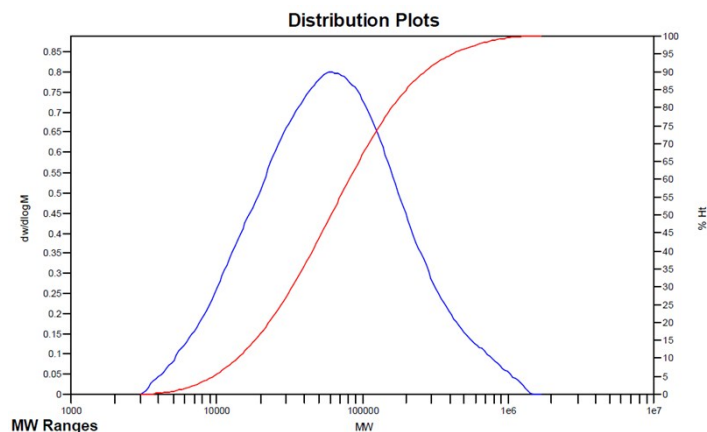

**Figure.S15** GPC spectra of typical CO<sub>2</sub>-WPU.
